# Supplementary material for: Does stream remediation reduce phosphorus and sediment exports from agricultural catchments?
Source: Copernicus journal article supplement (doi:10.5194/egusphere-2023-585), 2023-06-06
Supplement: Supplementary file 1 [file Supplement.pdf › Supplement_revision2/Supplement.pdf]

## Supplementary information of:

# Does stream remediation reduce phosphorus and sediment exports from agricultural catchments?

## 1. Catchment characteristics and spatial monitoring design

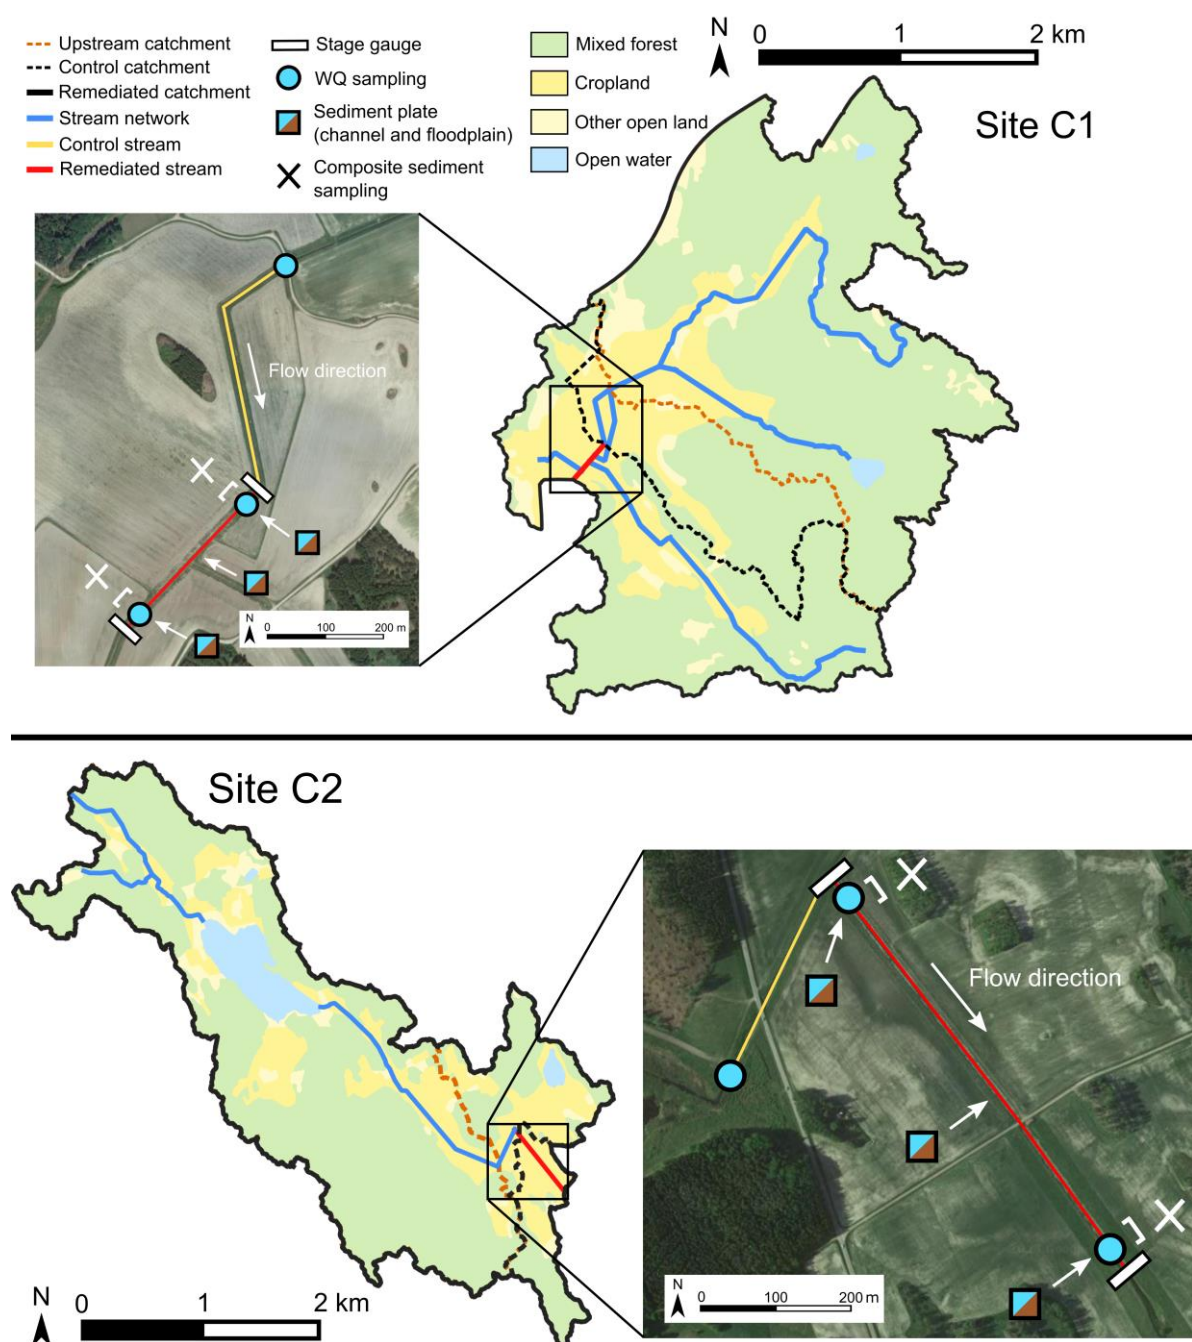

**Fig. S1.** Land use cover and catchment boundaries of remediated and control streams (C1 and C2). Location of stage gauges, water sampling, sediment plates and sediment sampling. Satellite images: Google, ©2023 Maxar Technologies. Land use maps: ©Lantmäteriet.

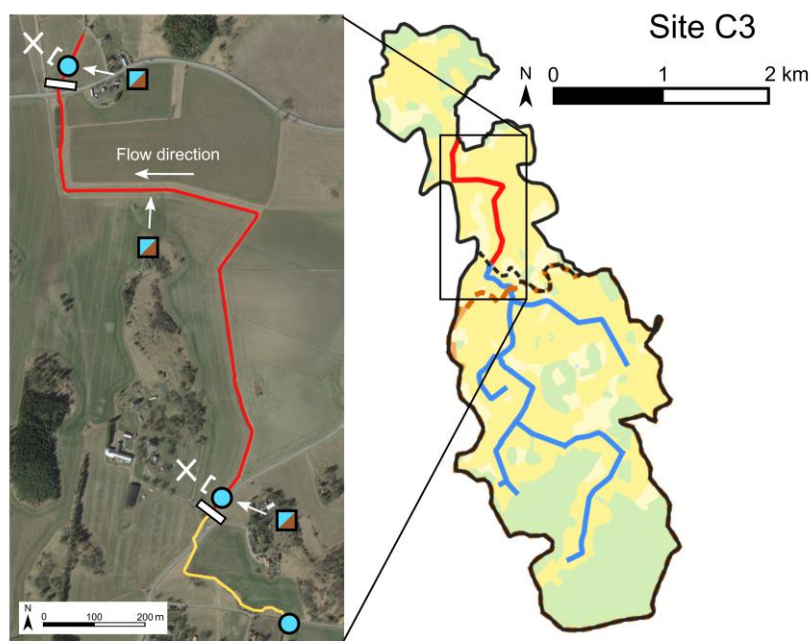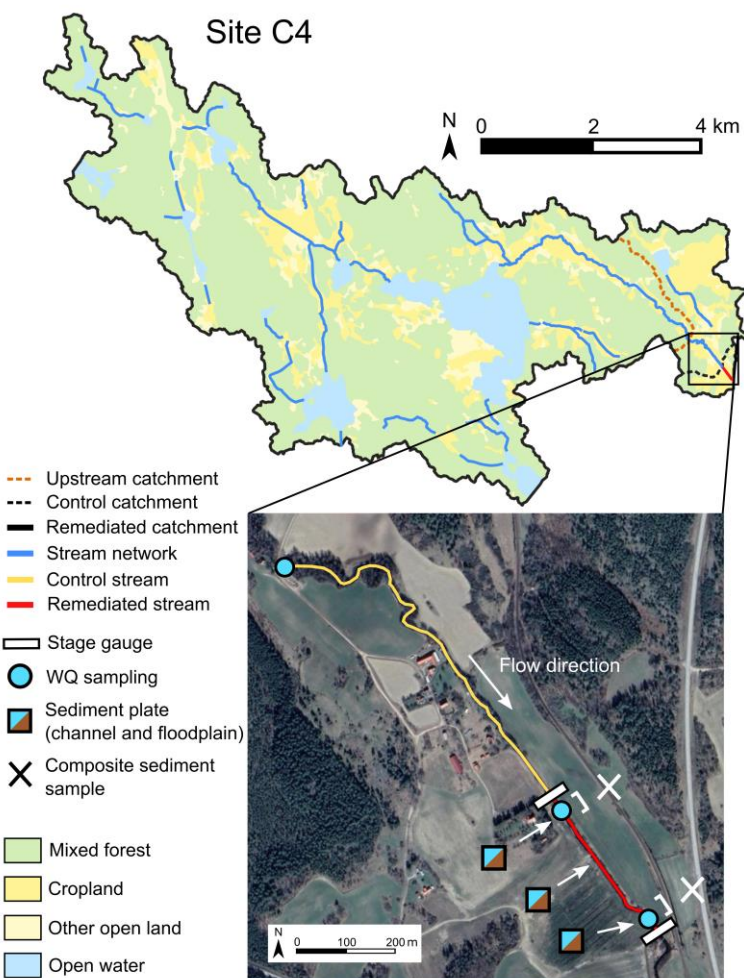

**Fig. S2. Land use cover and catchment boundaries of remediated and control streams (C3 and C4). Location of stage gauges, water sampling, sediment plates and sediment sampling. Satellite images: Google, ©2023 Maxar Technologies, ©2023 CNES / Airbus. Land use maps: ©Lantmäteriet.**

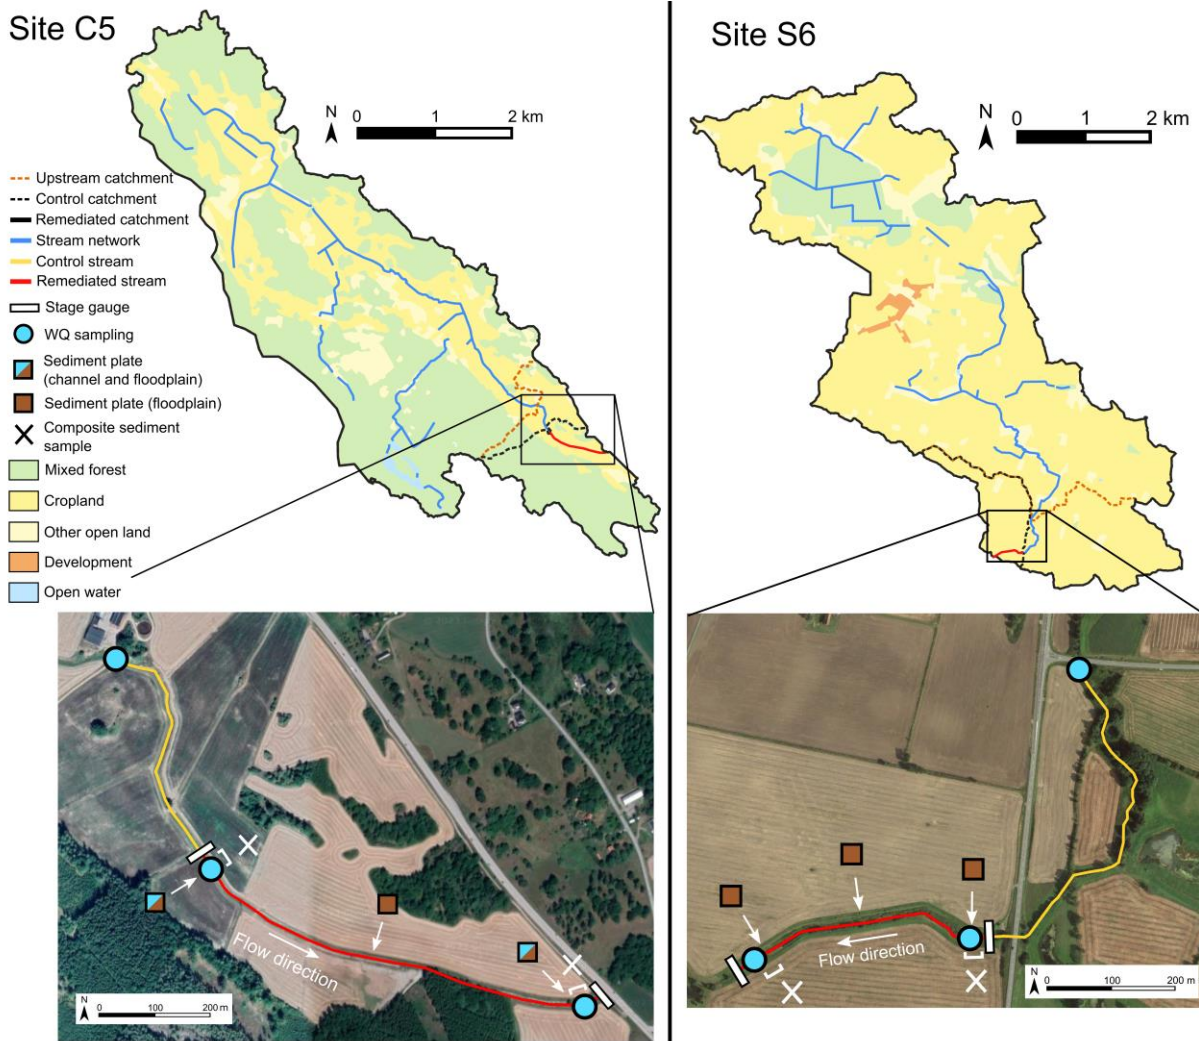

**Fig. S3. Land use cover and catchment boundaries of remediated and control streams (C5 and S6). Location of stage gauges, water sampling, sediment plates and sediment sampling. Satellite images: Google, ©2023 CNES / Airbus. Land use maps: ©Lantmäteriet.**

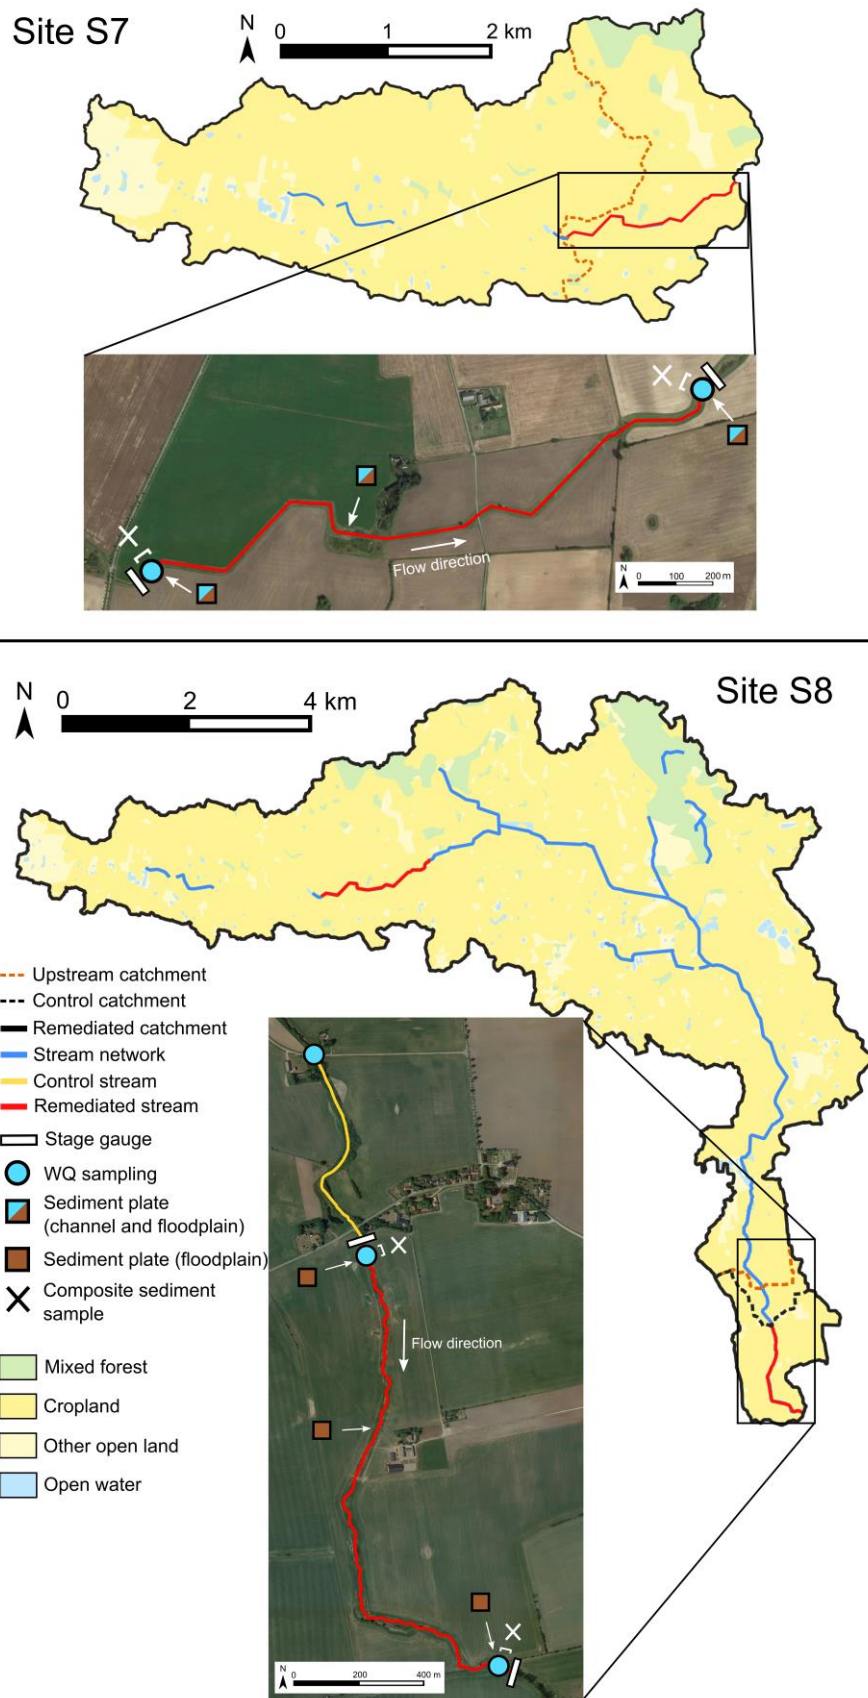

**Fig. S4. Land use cover and catchment boundaries of remediated and control streams (S7 and S8). Location of stage gauges, water sampling, sediment plates and sediment sampling. Satellite images: Google, ©2023 Landsat / Copernicus. Land use maps: ©Lantmäteriet.**

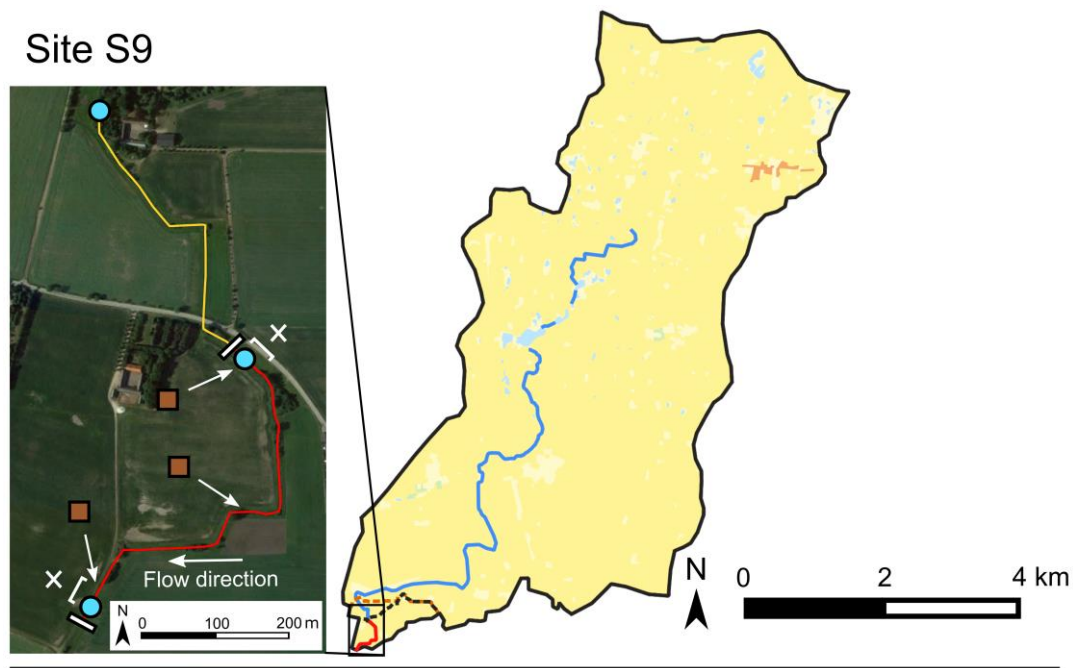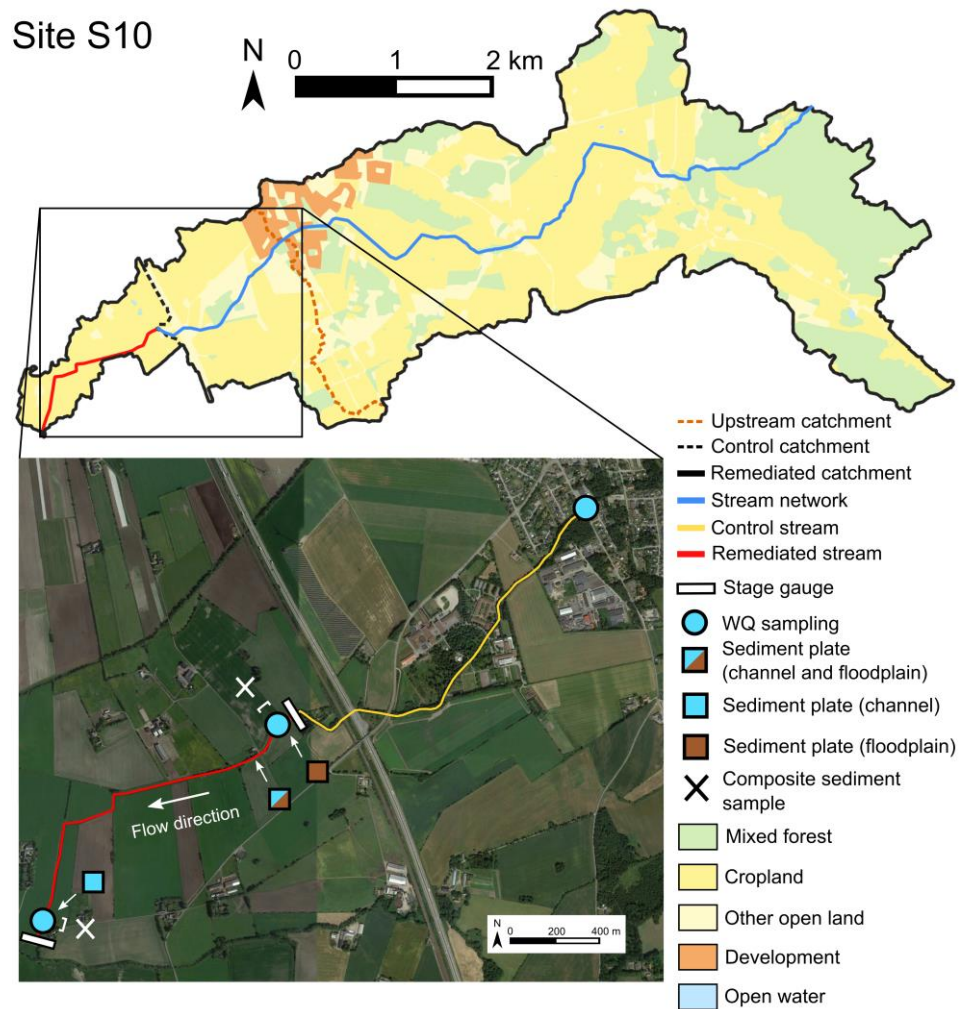

**Fig. S5. Land use cover and catchment boundaries of remediated and control streams (S9 and S10). Location of stage gauges, water sampling, sediment plates and sediment sampling. Satellite images: Google, ©2023 Landsat / Copernicus. Land use maps: ©Lantmäteriet.**

**Table S1. Characteristics of sub-catchments of control and remediated reaches (upstream catchment excluded) and channel geomorphology of control and remediated streams.**

| Site | Reach      | Sub-catchment area (ha) | Agricultural land use (%) | Reach length (m) | Channel bed width (m) | Bank elevation (m) | Channel slope (%) |
|------|------------|-------------------------|---------------------------|------------------|-----------------------|--------------------|-------------------|
| C1   | Control    | 127                     | 24                        | 440              | 2.39                  | 1.67               | 0.08              |
|      | Remediated | 294                     | 22                        | 340              | 1.03                  | 1.77               | 0.04              |
| C2   | Control    | 100                     | 37                        | 290              | 1.71                  | 1.79               | 0.08              |
|      | Remediated | 54                      | 46                        | 730              | 0.87                  | 1.70               | 0.04              |
| C3   | Control    | 16                      | 77                        | 450              | 0.89                  | 1.27               | 0.77              |
|      | Remediated | 202                     | 65                        | 1500             | 1.01                  | 2.24               | 0.30              |
| C4   | Control    | 326                     | 35                        | 900              | -                     | -                  | 0.37              |
|      | Remediated | 46                      | 46                        | 320              | 2.63                  | 1.41               | 0.10              |
| C5   | Control    | 52                      | 60                        | 450              | 1.57                  | 2.32               | 0.37              |
|      | Remediated | 184                     | 14                        | 780              | 1.08                  | 1.79               | 0.14              |
| S6   | Control    | 236                     | 84                        | 620              | 1.74                  | 1.70               | 0.71              |
|      | Remediated | 102                     | 92                        | 400              | 0.95                  | 1.62               | 0.17              |
| S7   | Remediated | 298                     | 82                        | 1960             | 0.86                  | 1.97               | 0.09              |
| S8   | Control    | 46                      | 81                        | 650              | -                     | -                  | 0.68              |
|      | Remediated | 200                     | 90                        | 1770             | 1.30                  | 1.33               | 0.47              |
| S9   | Control    | 13                      | 93                        | 450              | -                     | -                  | 0.25              |
|      | Remediated | 42                      | 90                        | 630              | 1.22                  | 1.37               | 0.44              |
| S10  | Control    | 234                     | 61                        | 1780             | -                     | -                  | 0.27              |
|      | Remediated | 100                     | 83                        | 1760             | 6.00                  | 2.17               | 0.09              |

## 2. Remediated and control stream profiles

**C1**

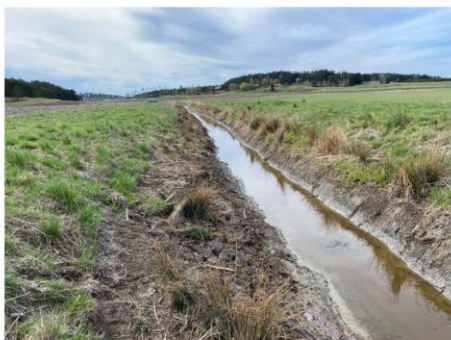

Remediated stream  
(upstream looking downstream)

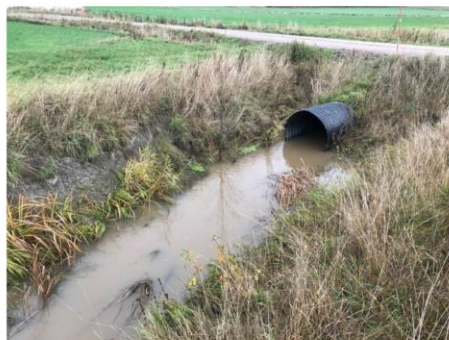

Control stream  
(upstream looking downstream)

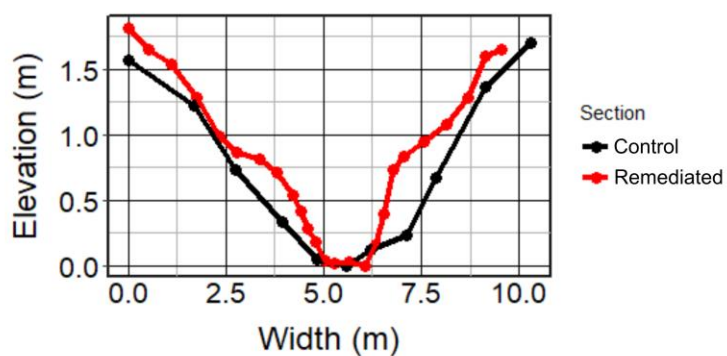

**C2**

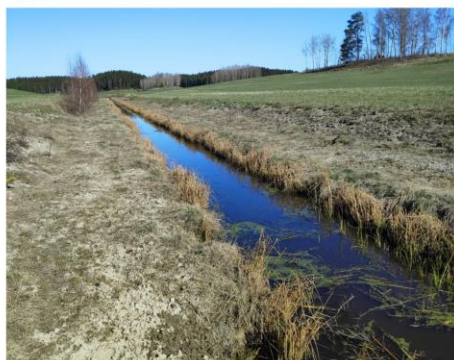

Remediated stream  
(downstream looking upstream)

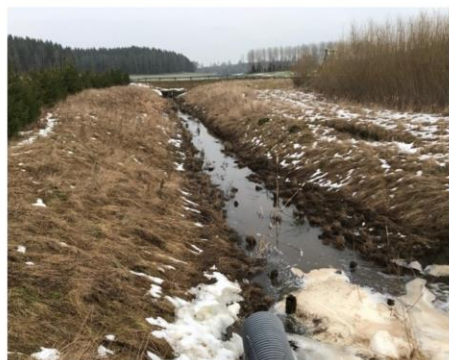

Control stream  
(upstream looking downstream)

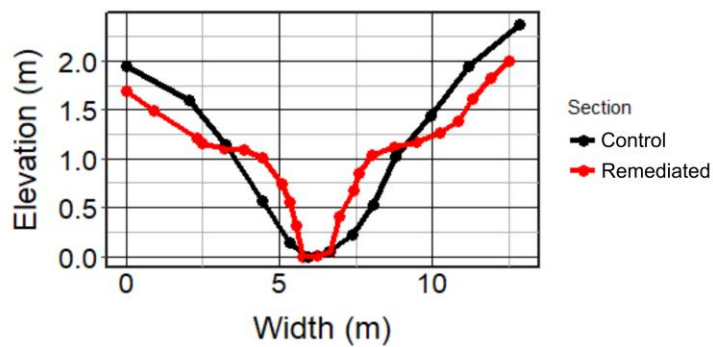

**Fig. S6. Photographs and cross-section profiles of remediated and control streams at site C1 and C2.**

**C3**

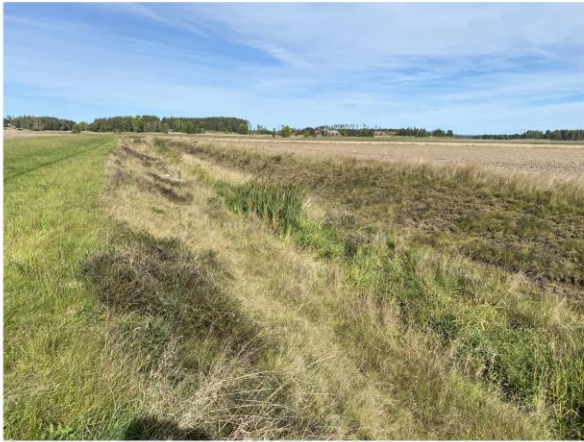

Remediated stream  
(midstream looking downstream)

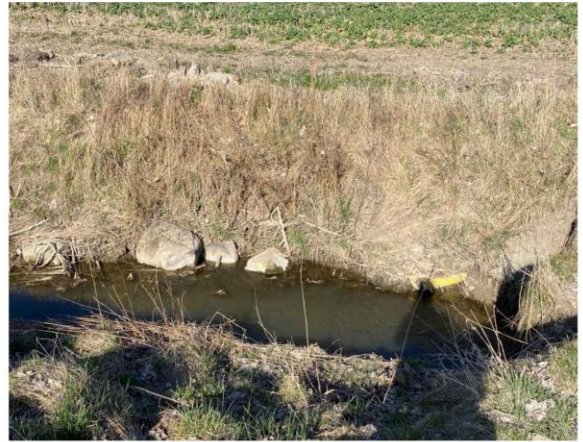

Control stream  
(upstream looking upstream)

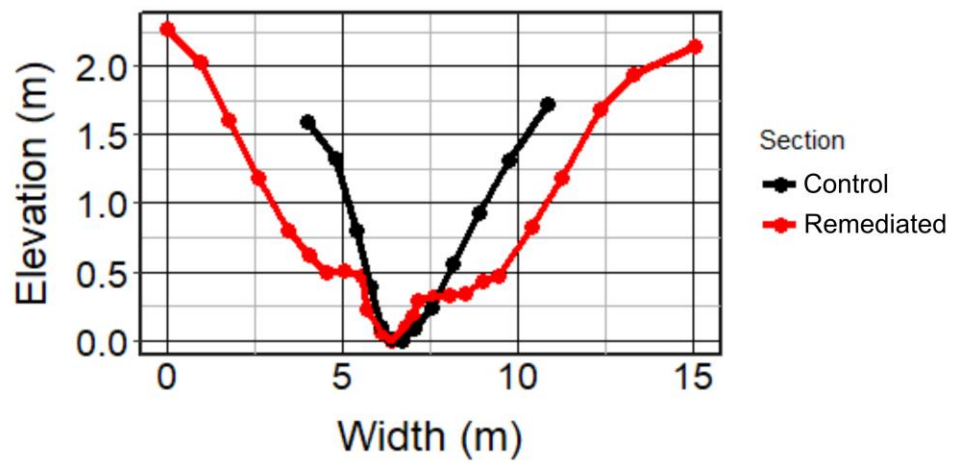

**C4**

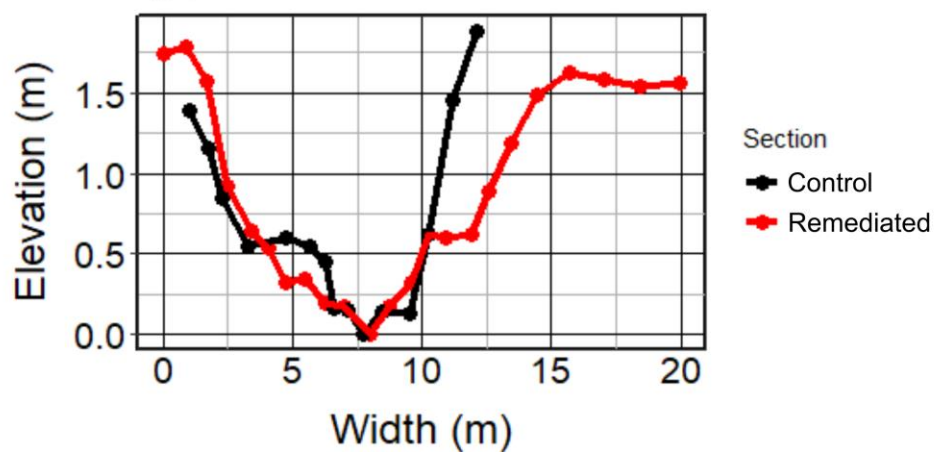

Fig. S7. Photographs (site C3) and cross-section profiles of remediated and control streams at site C3 and C4. No photographs taken of site C4 reaches.

**C5**

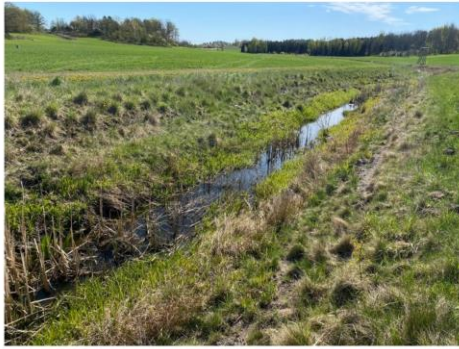

Remediated stream  
(upstream looking downstream)

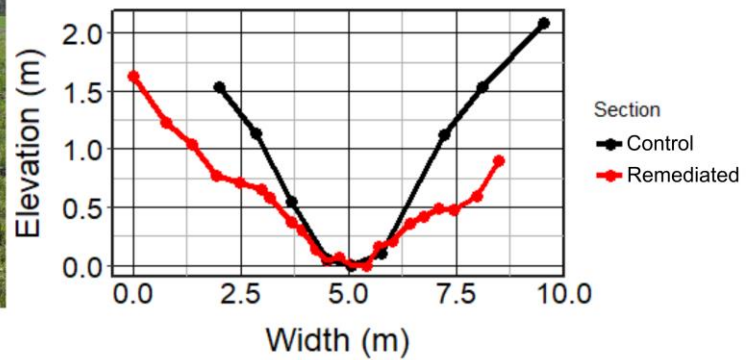

**S6**

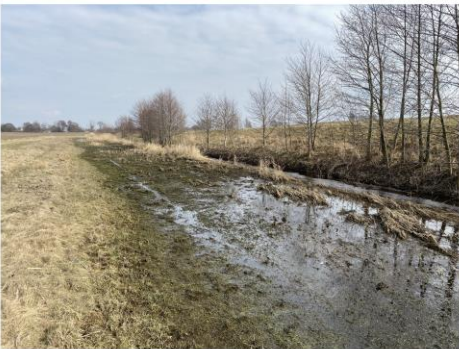

Remediated stream  
(midstream looking upstream)

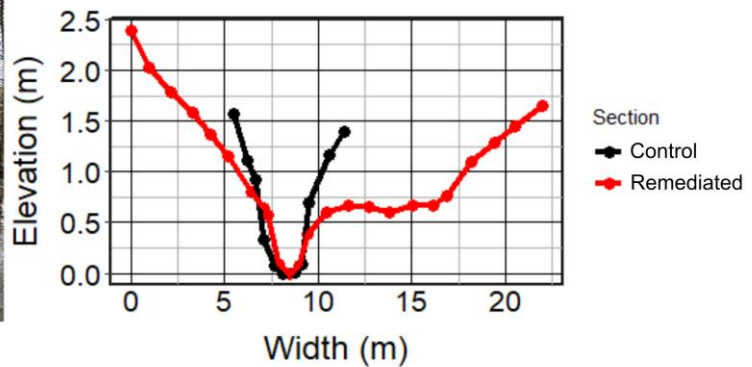

**S7**

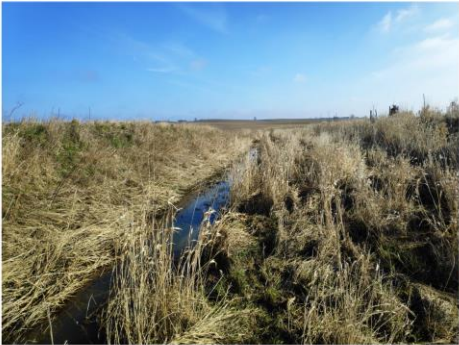

Remediated stream  
(upstream looking downstream)

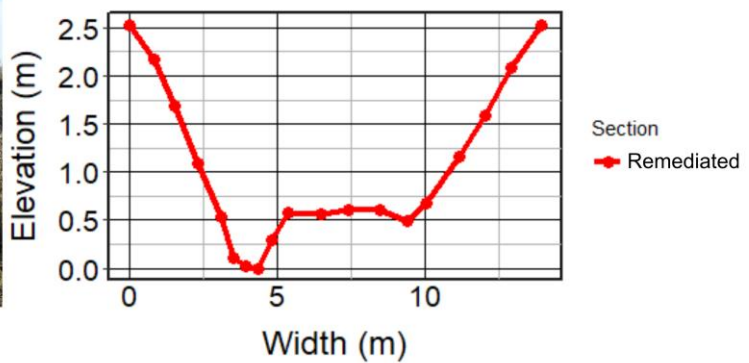

**Fig. S8. Photographs and cross-section profiles of remediated and control streams at site C5, S6-7. No photographs taken of control streams (C5, S6) and no control stream exist for site S7.**

**S8**

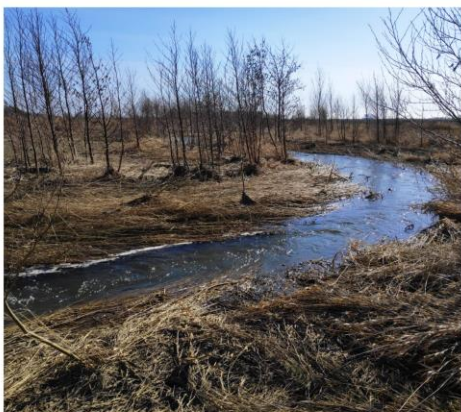

Remediated stream  
(upstream looking downstream)

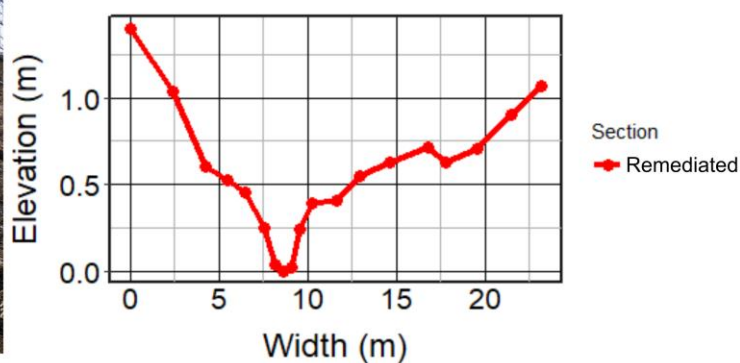

**S9**

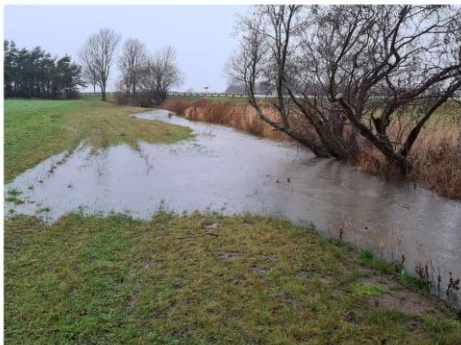

Remediated stream  
(midstream looking upstream)

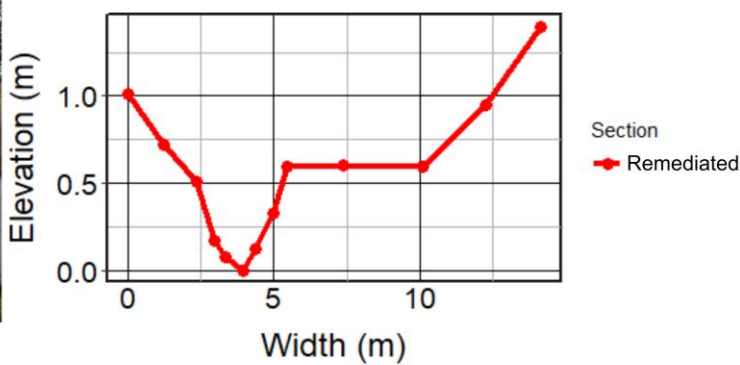

**S10**

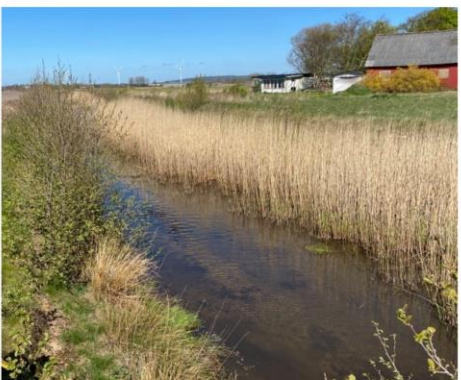

Remediated stream  
(downstream looking upstream)

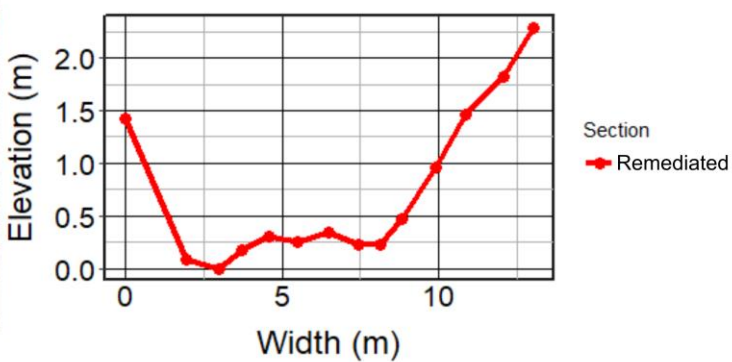

**Fig. S9. Photographs and cross-section profiles of remediated streams at site S8-10. No photographs taken and no cross-section measured of control streams in site S8-10.**

### 3. Mean concentration and annual loads of P

**Table S2. Mean concentrations  $\pm$  one standard deviation and loads of TP, PP, SS in control streams (TD), upstream remediated streams (US) and downstream remediated streams (DS). Samples were collected between April 2021 and June 2022. PP in site C3 was calculated as the difference of unfiltered TP and unfiltered reactive P. Longitudinal differences in water quality parameters were tested for each site with one-way ANOVA. Bold font denotes significant difference ( $p < 0.05$ ) between locations.**

| Site | Location | TP                                        |                                                | PP                                        |                                                | SS                                      |                                                   |
|------|----------|-------------------------------------------|------------------------------------------------|-------------------------------------------|------------------------------------------------|-----------------------------------------|---------------------------------------------------|
|      |          | Concentration<br>( $\mu\text{g L}^{-1}$ ) | Load<br>( $\text{kg ha}^{-1} \text{yr}^{-1}$ ) | Concentration<br>( $\mu\text{g L}^{-1}$ ) | Load<br>( $\text{kg ha}^{-1} \text{yr}^{-1}$ ) | Concentration<br>( $\text{mg L}^{-1}$ ) | Load<br>(tonnes $\text{ha}^{-1} \text{yr}^{-1}$ ) |
| C1   | TD       | 98.86 $\pm$ 70.92                         |                                                | 67.88 $\pm$ 59.07                         |                                                | 21.60 $\pm$ 13.34                       |                                                   |
|      | US       | 102.30 $\pm$ 53.65                        | 0.47                                           | 72.18 $\pm$ 41.70                         | 0.30                                           | 38.85 $\pm$ 42.77                       | 0.11                                              |
|      | DS       | 112.27 $\pm$ 73.74                        | 0.34                                           | 88.82 $\pm$ 66.11                         | 0.23                                           | 54.89 $\pm$ 100.91                      | 0.09                                              |
| C2   | TD       | <b>339.50 <math>\pm</math> 322.77</b>     |                                                | <b>205.39 <math>\pm</math> 253.12</b>     |                                                | <b>57.32 <math>\pm</math> 93.46</b>     |                                                   |
|      | US       | <b>385.21 <math>\pm</math> 216.26</b>     | 0.51                                           | <b>293.34 <math>\pm</math> 200.56</b>     | 0.36                                           | <b>78.04 <math>\pm</math> 83.77</b>     | 0.11                                              |
|      | DS       | <b>206.24 <math>\pm</math> 104.88</b>     |                                                | <b>122.35 <math>\pm</math> 61.95</b>      |                                                | <b>24.87 <math>\pm</math> 22.04</b>     |                                                   |
| C3   | TD       | 360.53 $\pm$ 346.56                       |                                                | 170.51 $\pm$ 379.24                       |                                                | 15.27 $\pm$ 14.18                       |                                                   |
|      | US       | 240.82 $\pm$ 206.44                       | 0.11                                           | 58.58 $\pm$ 103.47                        |                                                | 14.13 $\pm$ 22.27                       | 0.01                                              |
|      | DS       | 212.20 $\pm$ 155.07                       | 0.17                                           | 63.74 $\pm$ 75.73                         |                                                | 21.78 $\pm$ 32.34                       | 0.01                                              |
| C4   | TD       | <b>32.21 <math>\pm</math> 13.55</b>       |                                                | 20.83 $\pm$ 12.04                         |                                                | 8.69 $\pm$ 6.19                         |                                                   |
|      | US       | <b>47.44 <math>\pm</math> 22.25</b>       | 0.07                                           | 31.80 $\pm$ 18.00                         | 0.05                                           | 12.23 $\pm$ 6.98                        | 0.02                                              |
|      | DS       | <b>62.47 <math>\pm</math> 54.62</b>       | 0.11                                           | 42.84 $\pm$ 46.27                         | 0.07                                           | 11.19 $\pm$ 10.53                       | 0.02                                              |
| C5   | TD       | 111.69 $\pm$ 51.08                        |                                                | <b>59.27 <math>\pm</math> 28.91</b>       |                                                | 11.59 $\pm$ 5.97                        |                                                   |
|      | US       | 131.90 $\pm$ 92.27                        | 0.22                                           | <b>84.06 <math>\pm</math> 85.06</b>       | 0.11                                           | 30.22 $\pm$ 47.09                       | 0.03                                              |
|      | DS       | 105.73 $\pm$ 50.86                        | 0.23                                           | <b>72.87 <math>\pm</math> 51.16</b>       | 0.14                                           | 31.79 $\pm$ 34.28                       | 0.05                                              |
| S6   | TD       | 88.19 $\pm$ 52.06                         |                                                | 27.46 $\pm$ 10.31                         |                                                | 20.17 $\pm$ 49.75                       |                                                   |
|      | US       | 93.19 $\pm$ 55.09                         | 0.54                                           | 26.79 $\pm$ 8.70                          | 0.22                                           | 13.60 $\pm$ 24.33                       | 0.08                                              |
|      | DS       | 104.48 $\pm$ 83.77                        | 0.64                                           | 48.62 $\pm$ 64.62                         | 0.35                                           | 40.10 $\pm$ 109.49                      | 0.31                                              |
| S7   | TD       | -                                         |                                                | -                                         |                                                | -                                       |                                                   |
|      | US       | 433.86 $\pm$ 774.73                       | 1.10                                           | 309.48 $\pm$ 707.19                       | 0.70                                           | 103.62 $\pm$ 209.82                     | 0.31                                              |
|      | DS       | 474.22 $\pm$ 606.19                       | 1.25                                           | 398.79 $\pm$ 589.92                       | 0.94                                           | 54.40 $\pm$ 82.07                       | 0.34                                              |
| S8   | TD       | 117.15 $\pm$ 59.18                        |                                                | 59.80 $\pm$ 54.54                         |                                                | 18.33 $\pm$ 35.60                       |                                                   |
|      | US       | 145.67 $\pm$ 86.31                        | 1.07                                           | 84.44 $\pm$ 78.59                         | 0.73                                           | 24.50 $\pm$ 37.29                       | 0.32                                              |
|      | DS       | 128.88 $\pm$ 51.59                        | 0.63                                           | 61.84 $\pm$ 40.91                         | 0.37                                           | 17.43 $\pm$ 19.32                       | 0.14                                              |
| S9   | TD       | 149.62 $\pm$ 141.82                       |                                                | 63.29 $\pm$ 98.83                         |                                                | 10.94 $\pm$ 10.99                       |                                                   |
|      | US       | 145.93 $\pm$ 111.35                       | 0.26                                           | 60.35 $\pm$ 81.40                         | 0.08                                           | 11.95 $\pm$ 14.36                       | 0.02                                              |
|      | DS       | 143.55 $\pm$ 158.12                       | 0.23                                           | 55.26 $\pm$ 58.55                         | 0.09                                           | 9.91 $\pm$ 15.62                        | 0.02                                              |
| S10  | TD       | 55.44 $\pm$ 48.29                         |                                                | 38.19 $\pm$ 35.47                         |                                                | 7.16 $\pm$ 8.86                         |                                                   |
|      | US       | 54.00 $\pm$ 33.97                         | 0.28                                           | 37.02 $\pm$ 27.41                         | 0.20                                           | 9.08 $\pm$ 9.13                         | 0.05                                              |
|      | DS       | 66.56 $\pm$ 48.56                         | 0.35                                           | 45.28 $\pm$ 44.27                         | 0.23                                           | 13.55 $\pm$ 28.34                       | 0.05                                              |

#### 4. Changes in P concentrations across sediment P deposition rates

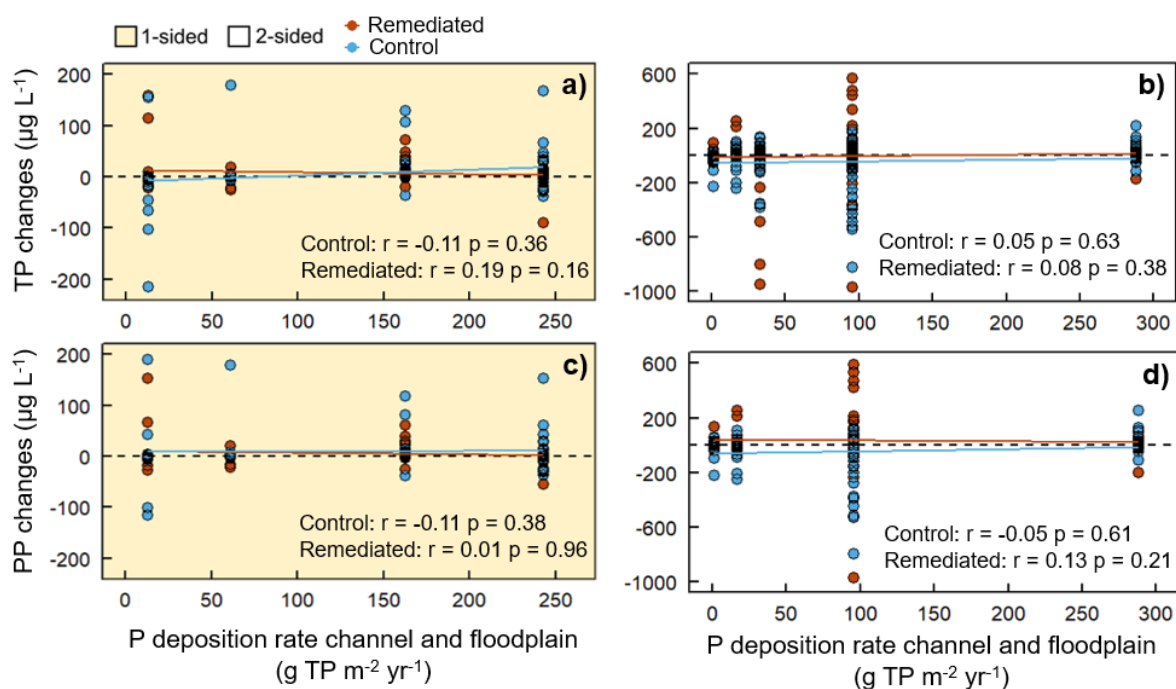

**Fig. S10. Correlations between stream water P concentration changes along remediated and control streams and P deposition rates on channel beds and floodplains of remediated streams. Changes in TP concentrations along a) one-sided floodplains and b) two-sided floodplains and changes in PP concentrations along c) one-sided floodplains and d) two-sided floodplains. For sites without P deposition monitoring on channel beds (S6, S8–9), only floodplain deposition is shown. Site S7 was excluded due to no control stream. P-values of Pearson correlations are shown within each panels.**

## 5. Catchment drivers for sediment P deposition

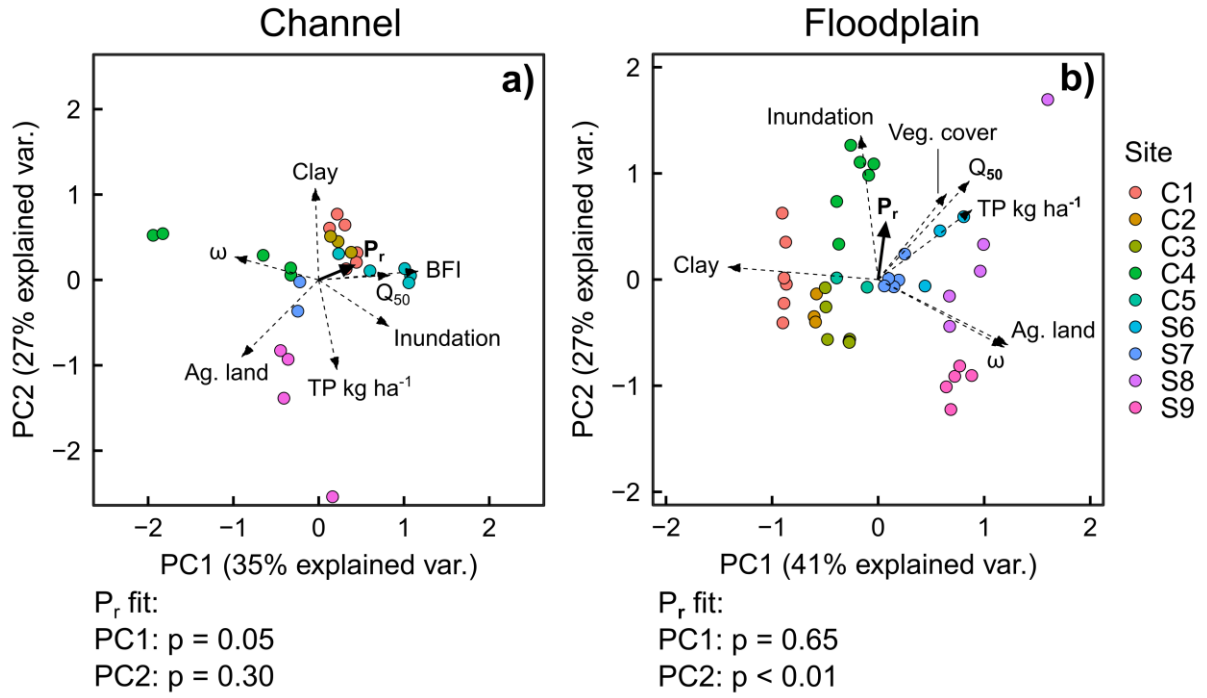

**Fig. S11. Principal component analysis (PCA) of predictor variables (water chemistry, catchment and channel properties). Correlation with P deposition rates ( $P_r$ ) on a) channel beds and b) floodplains. The influence of predictor variables on sample distributions are indicated by dashed vectors. The  $P_r$  was significantly correlated ( $p < 0.05$ ) with the ordinations and is shown as blue vectors, with lengths proportional to the strength of the correlation. Circle color denote samples from 9 sites. Sample sites with missing variables were removed from the analyses and descriptor variables were standardized to equal standard deviations.  $\omega$  = unit stream power,  $Q_{50}$  = median flow discharge, BFI = base flow index, SS load = 2.5 yr mean of suspended sediments loads (tonnes yr<sup>-1</sup>).**

## 6. Phosphorus fractions and content in composite sediments

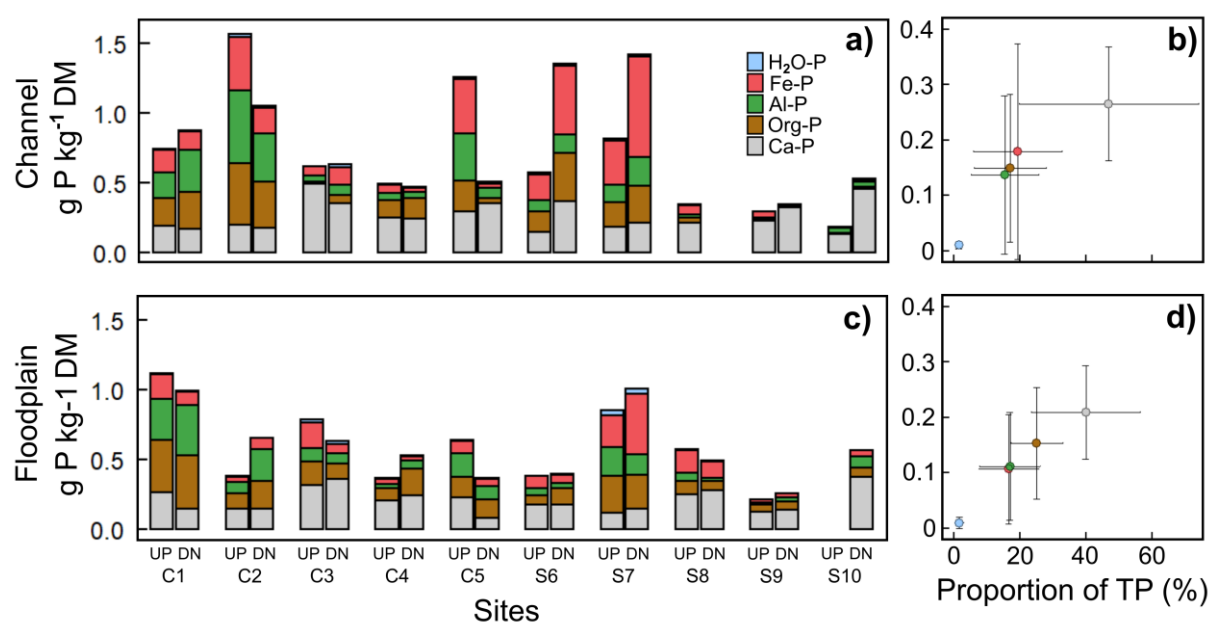

**Fig. S12.** Mass of P fractions in composite sediments in a) channel beds and c) floodplains of remediated streams across all studied sites. The relation between P fraction mass and proportions of total P in b) channel bed and d) floodplain sediments, with standard deviations shown as error bars. H<sub>2</sub>O-P = water soluble P, Fe-P = P adsorbed to iron and manganese, Al-P = P adsorbed mainly to aluminum, Org-P = organic-bound P and Ca-P = calcium-bound P.
